# Supplementary material for: Freeze-drying can replace cold-chains for transport and storage of fecal microbiome samples
Source: PeerJ journal article supplement (doi:10.7717/peerj.13095), 2022-03-15

● Freeze-dried ● Frozen

A) Weighted UniFrac

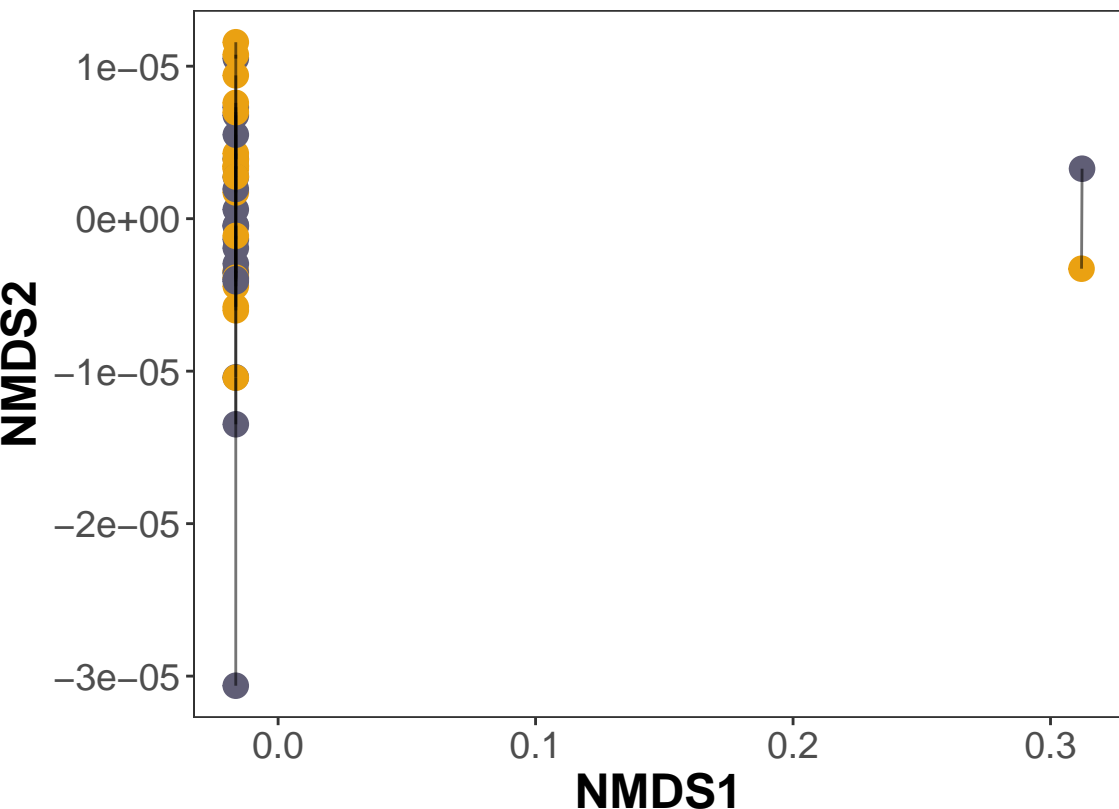

B) Unweighted UniFrac

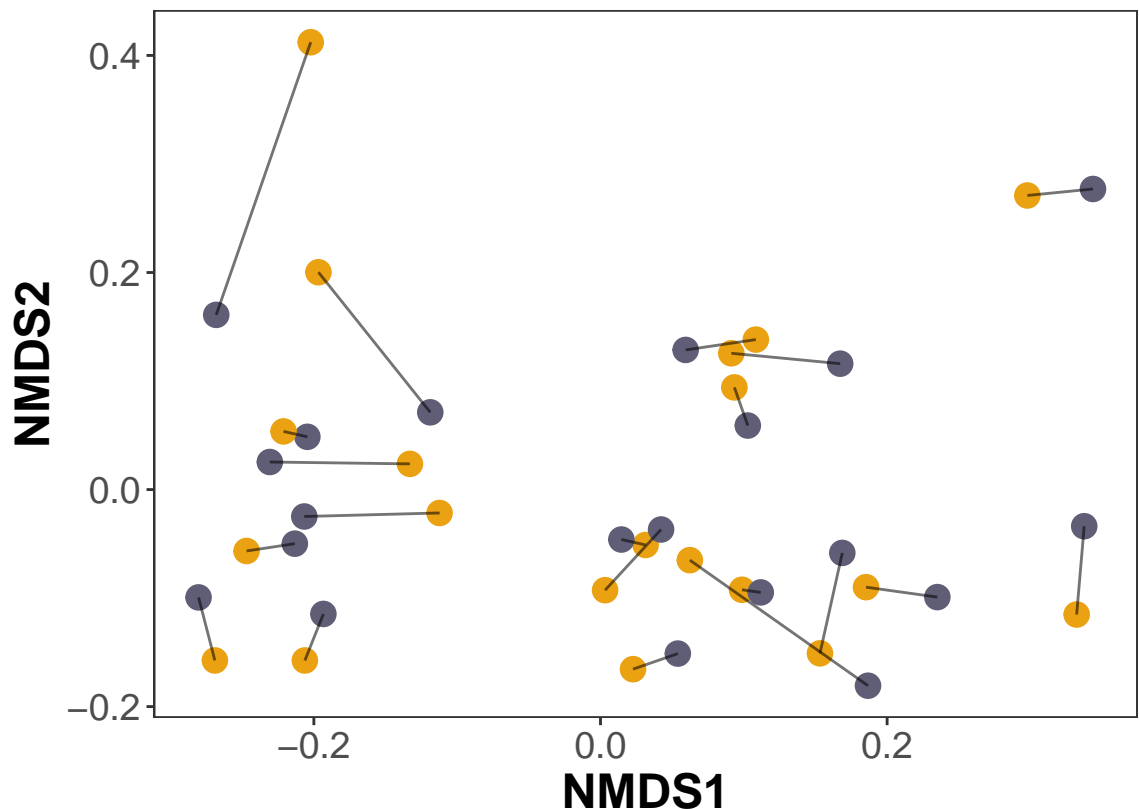

Supplement: Figure_S2.pdf [file Figure_S2.pdf]
